CORRECTION

# Correction: Testosterone suppresses uropathogenic *Escherichia coli* invasion and colonization within prostate cells and inhibits inflammatory responses through JAK/STAT-1 signaling pathway

Chen-Hsun Ho, Chia-Kwung Fan, Hong-Jeng Yu, Chia-Chang Wu, Kuan-Chou Chen, Shih-Ping Liu, Po-Ching Cheng

There are errors in the author affiliations. The affiliations should appear as shown here:

Chen-Hsun Ho<sup>1,2</sup>, Chia-Kwung Fan<sup>3,4</sup>, Hong-Jeng Yu<sup>5</sup>, Chia-Chang Wu<sup>1,2</sup>, Kuan-Chou Chen<sup>1,2</sup>, Shih-Ping Liu<sup>5</sup>, Po-Ching Cheng<sup>3,4</sup>

**1** Department of Urology, School of Medicine, College of Medicine, Taipei Medical University, Taipei, Taiwan, **2** Department of Urology, Taipei Medical University-Shuang Ho Hospital, Taipei, Taiwan, **3** Department of Molecular Parasitology and Tropical Diseases, School of Medicine, College of Medicine, Taipei Medical University, Taipei, Taiwan, **4** Center for International Tropical Medicine, School of Medicine, College of Medicine, Taipei Medical University, Taipei, Taiwan, **5** Department of Urology, National Taiwan University Hospital and College of Medicine, Taipei, Taiwan

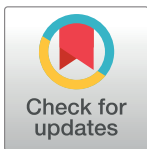

## Reference

1. Ho C-H, Fan C-K, Yu H-J, Wu C-C, Chen K-C, Liu S-P, et al. (2017) Testosterone suppresses uropathogenic *Escherichia coli* invasion and colonization within prostate cells and inhibits inflammatory responses through JAK/STAT-1 signaling pathway. PLoS ONE 12(6): e0180244. <https://doi.org/10.1371/journal.pone.0180244> PMID: 28665978

## OPEN ACCESS

**Citation:** Ho C-H, Fan C-K, Yu H-J, Wu C-C, Chen K-C, Liu S-P, et al. (2017) Correction: Testosterone suppresses uropathogenic *Escherichia coli* invasion and colonization within prostate cells and inhibits inflammatory responses through JAK/STAT-1 signaling pathway. PLoS ONE 12(12): e0190317. <https://doi.org/10.1371/journal.pone.0190317>

**Published:** December 20, 2017

**Copyright:** © 2017 Ho et al. This is an open access article distributed under the terms of the [Creative Commons Attribution License](https://creativecommons.org/licenses/by/4.0/), which permits unrestricted use, distribution, and reproduction in any medium, provided the original author and source are credited.
